# Supplementary material for: Coordination properties of Cu(ii) ions towards a phosphorylated fragment from the R1 domain of the tau protein and the effect of Ser phosphorylation on Cu(ii) binding affinity
Source: Royal Society of Chemistry journal article supplement (doi:10.1039/d2dt02838g), 2022-11-16
Supplement: d2dt02838g1.pdf [file d2dt02838g1.pdf]

## Electronic Supplementary Information

### **Coordination properties of Cu(II) ions towards a phosphorylated fragment from the R1 domain of the tau protein and the effect of Ser phosphorylation on Cu(II) binding affinity**

Dimitra Kyriakou, Eleni Bletsas, Vassilios Moussis, Yiannis Deligiannakis  
and Gerasimos Malandrinos

**Footnote:** Electronic supplementary information (ESI) available: 1 and 2D NMR (Figures S1-S10), EPR (Figures S12, S13) and CD (Figure S14) spectra, and NMR data for both peptides (Tables S1 and S2)

**Table S1**  $^1\text{H}$  ( $\delta$ , ppm) chemical shifts of the peptide Ac-GS(P)TENLKH-NH<sub>2</sub> in H<sub>2</sub>O: D<sub>2</sub>O 9:1 v/v solution at pH 2.5, T=298K.

|                                 | $\alpha\text{H}$ | $\beta\text{H}$ | $\gamma\text{H}$ | $\gamma\text{CH}_2$ | CONH <sub>2</sub>        | $\delta\text{CH}_2$ | $\delta\text{CH}_3$ | $\epsilon\text{CH}_2$ | $\epsilon\text{NH}_3^+$ | H( $\epsilon 1$ ) | H( $\delta 2$ ) | NH   |
|---------------------------------|------------------|-----------------|------------------|---------------------|--------------------------|---------------------|---------------------|-----------------------|-------------------------|-------------------|-----------------|------|
| <b>Ac</b>                       | 1.97             |                 |                  |                     |                          |                     |                     |                       |                         |                   |                 |      |
| <b>Gly</b>                      | 3.91<br>3.96     | ---             | ---              | ---                 | ----                     | ----                | ---                 | ---                   | ---                     | ---               | ---             | 8.23 |
| <b>Ser</b>                      | 4.53             | 4.09,<br>4.14   | ---              | ---                 | ---                      | ---                 | ---                 | ---                   | ---                     | ---               | ---             | 8.60 |
| <b>Thr</b>                      | 4.22             | 4.27            | 1.14             | ---                 | ---                      | ---                 | ---                 | ---                   | ---                     | ---               | ---             | 8.11 |
| <b>Glu</b>                      | 4.28             | 1.95,<br>2.03   | 2.40             | ---                 | ---                      | ---                 | ---                 | ---                   | ---                     | ---               | ---             | 8.09 |
| <b>Asn</b>                      | 4.58             | 2.67,<br>2.76   | ---              | ---                 | 7.52(trans)<br>6.67(cis) | ---                 | ---                 | ---                   | ---                     | ---               | ---             | 8.30 |
| <b>Leu</b>                      | 4.21             | 1.52,<br>1.55   | 1.52<br>1.55     | ---                 | ---                      | ---                 | 0.83,<br>0.77       | ---                   | ---                     | ---               | ---             | 8.00 |
| <b>Lys</b>                      | 4.17             | 1.69            | ---              | 1.34                | ---                      | 1.58                | ---                 | 2.89                  | 7.44                    | ---               | ---             | 8.10 |
| <b>His</b>                      | 4.60             | 3.03,<br>3.14   | ---              | ---                 | ---                      | ---                 | ---                 | ---                   | ---                     | 8.53              | 7.22            | 8.34 |
| <b>CONH<sub>2</sub><br/>His</b> | ---              | ---             | ---              | ---                 | 7.52(trans)<br>6.82(cis) | ---                 | ---                 | ---                   | ---                     | ---               | ---             | ---  |

**Table S2**  $^1\text{H}$  ( $\delta$ , ppm) chemical shifts of the peptide Ac-GSTENLKH-NH<sub>2</sub> in H<sub>2</sub>O: D<sub>2</sub>O 9:1 v/v solution at pH 2.5, T=298K.

|                                 | $\alpha\text{H}$ | $\beta\text{H}$ | $\gamma\text{H}$ | $\gamma\text{CH}_2$ | CONH <sub>2</sub>         | $\delta\text{CH}_2$ | $\delta\text{CH}_3$ | $\epsilon\text{CH}_2$ | $\epsilon\text{NH}_3^+$ | H( $\epsilon 1$ ) | H( $\delta 2$ ) | NH   |
|---------------------------------|------------------|-----------------|------------------|---------------------|---------------------------|---------------------|---------------------|-----------------------|-------------------------|-------------------|-----------------|------|
| <b>Ac</b>                       | 1.97             |                 |                  |                     |                           |                     |                     |                       |                         |                   |                 |      |
| <b>Gly</b>                      | 3.92             | ---             | ---              | ---                 | ----                      | ----                | ---                 | ---                   | ---                     | ---               | ---             | 8.23 |
| <b>Ser</b>                      | 4.48             | 3.85            | ---              | ---                 | ---                       | ---                 | ---                 | ---                   | ---                     | ---               | ---             | 8.31 |
| <b>Thr</b>                      | 4.27             | 4.22            | 1.13             | ---                 | ---                       | ---                 | ---                 | ---                   | ---                     | ---               | ---             | 8.19 |
| <b>Glu</b>                      | 4.21             | 1.90<br>2.00    | 2.35             | ---                 | ---                       | ---                 | ---                 | ---                   | ---                     | ---               | ---             | 8.18 |
| <b>Asn</b>                      | 4.61             | 3.09<br>3.20    | ---              | ---                 | 7.52(trans)<br>7.12 (cis) | ---                 | ---                 | ---                   | ---                     | ---               | ---             | 8.33 |
| <b>Leu</b>                      | 4.21             | 1.56            | 1.48             | ---                 | ---                       | ---                 | 0.77<br>0.83        | ---                   | ---                     | ---               | ---             | 8.02 |
| <b>Lys</b>                      | 4.17             | 1.65            | ---              | 1.28                | ---                       | 1.55                | ---                 | 2.89                  | 7.43                    | ---               | ---             | 8.11 |
| <b>His</b>                      | 4.61             | 3.09<br>3.20    | ---              | ---                 | ---                       | ---                 | ---                 | ---                   | ---                     | 8.53              | 7.22            | 8.35 |
| <b>CONH<sub>2</sub><br/>His</b> | ---              | ---             | ---              | ---                 | 7.54(trans)<br>6.82 (cis) | ---                 | ---                 | ---                   | ---                     | ---               | ---             | ---  |

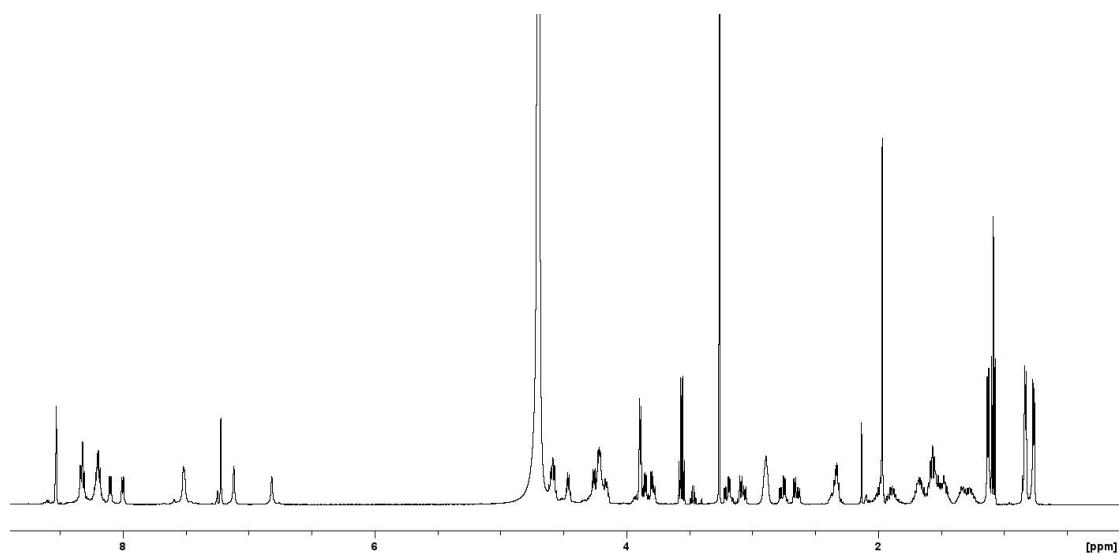

**Figure S1.** 1D  $^1\text{H}$  NMR spectrum of the peptide Ac-GSTENLKH-NH<sub>2</sub> (C=2 mM and T=298K)

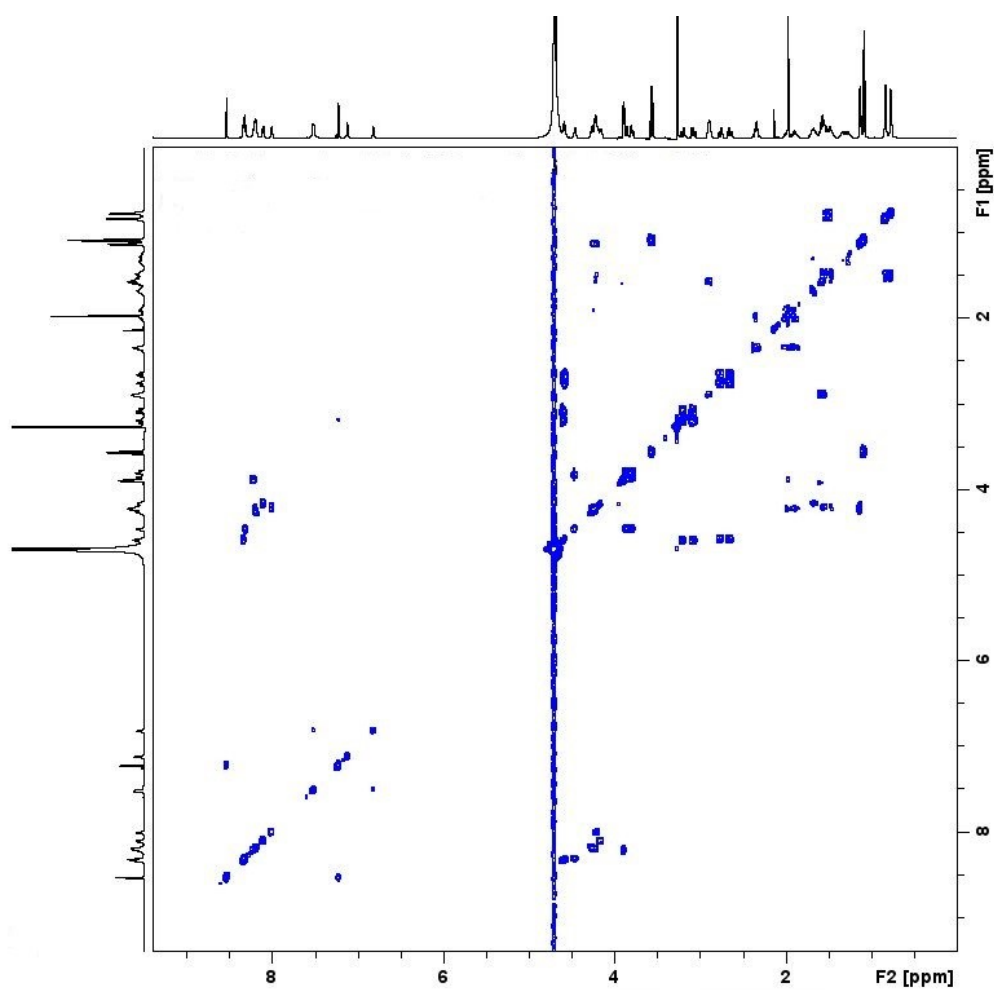

**Figure S2.**  $^1\text{H}$   $^1\text{H}$  COSY NMR spectrum of the peptide Ac-GSTENLKH-NH<sub>2</sub> (C=2 mM and T=298K)

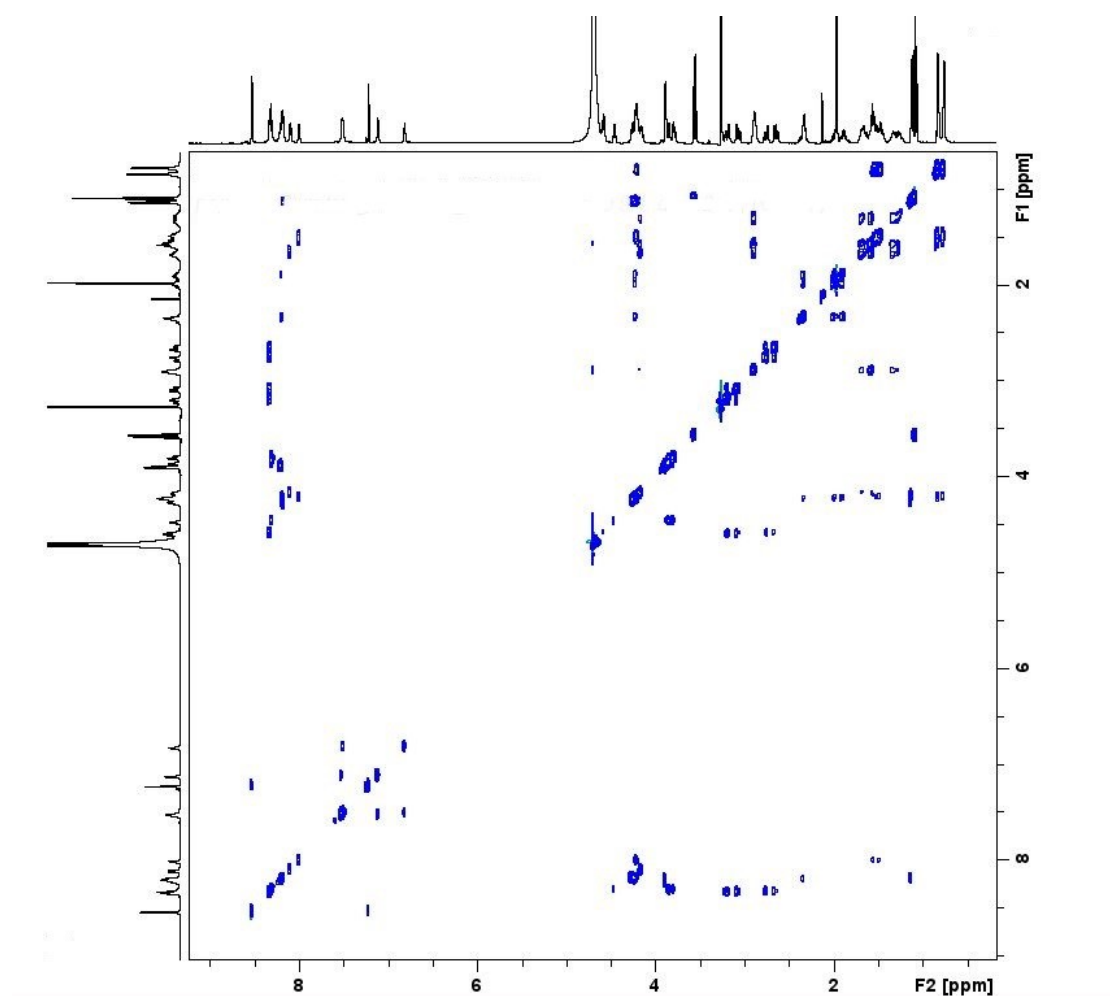

**Figure S3.**  $^1\text{H}$   $^1\text{H}$  TOCSY NMR spectrum of the peptide Ac-GSTENLKH-NH<sub>2</sub> (C=2 mM and T=298K)

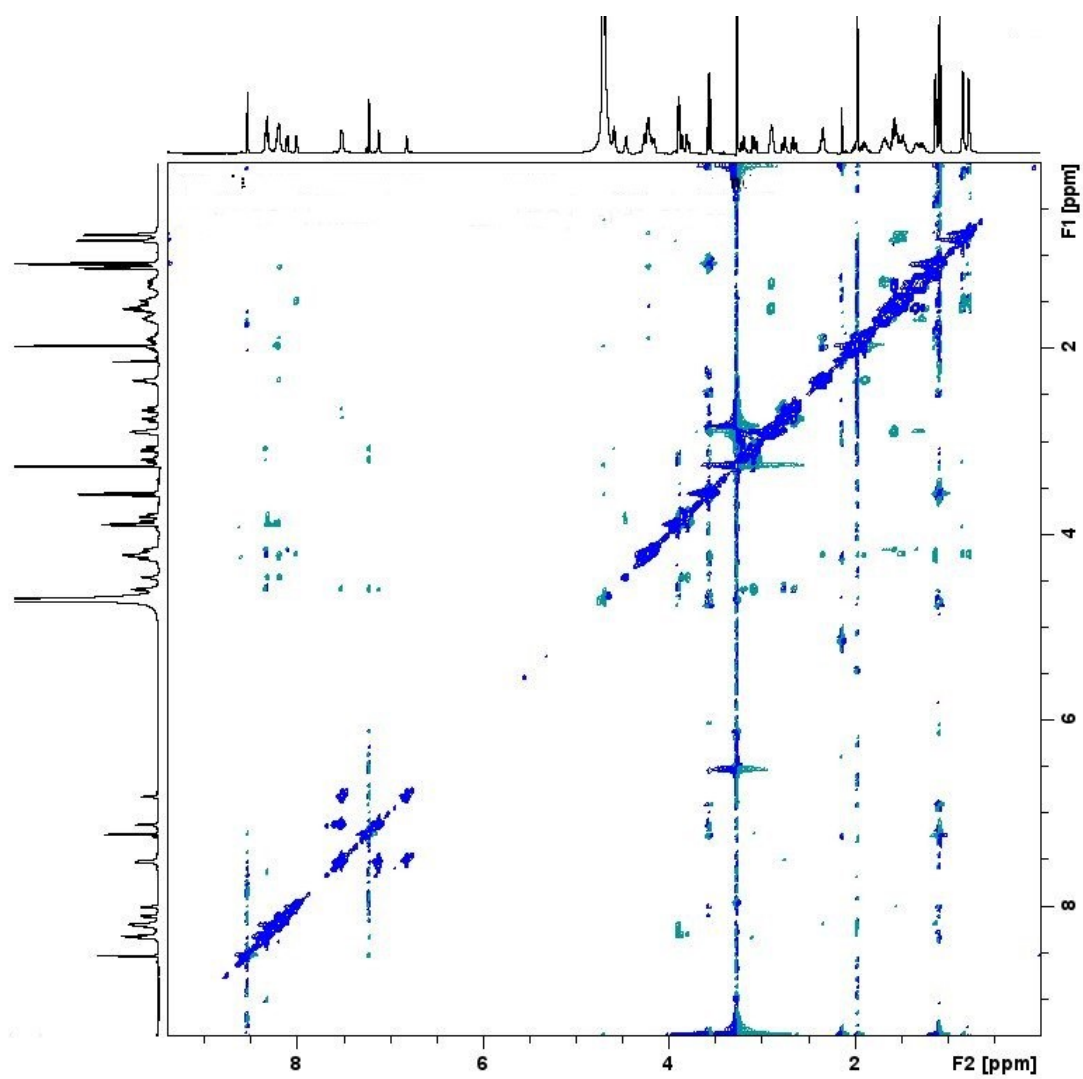

**Figure S4.** <sup>1</sup>H <sup>1</sup>H NOESY NMR spectrum of the peptide Ac-GSTENLKH-NH<sub>2</sub> (C=2 mM and T=298K)

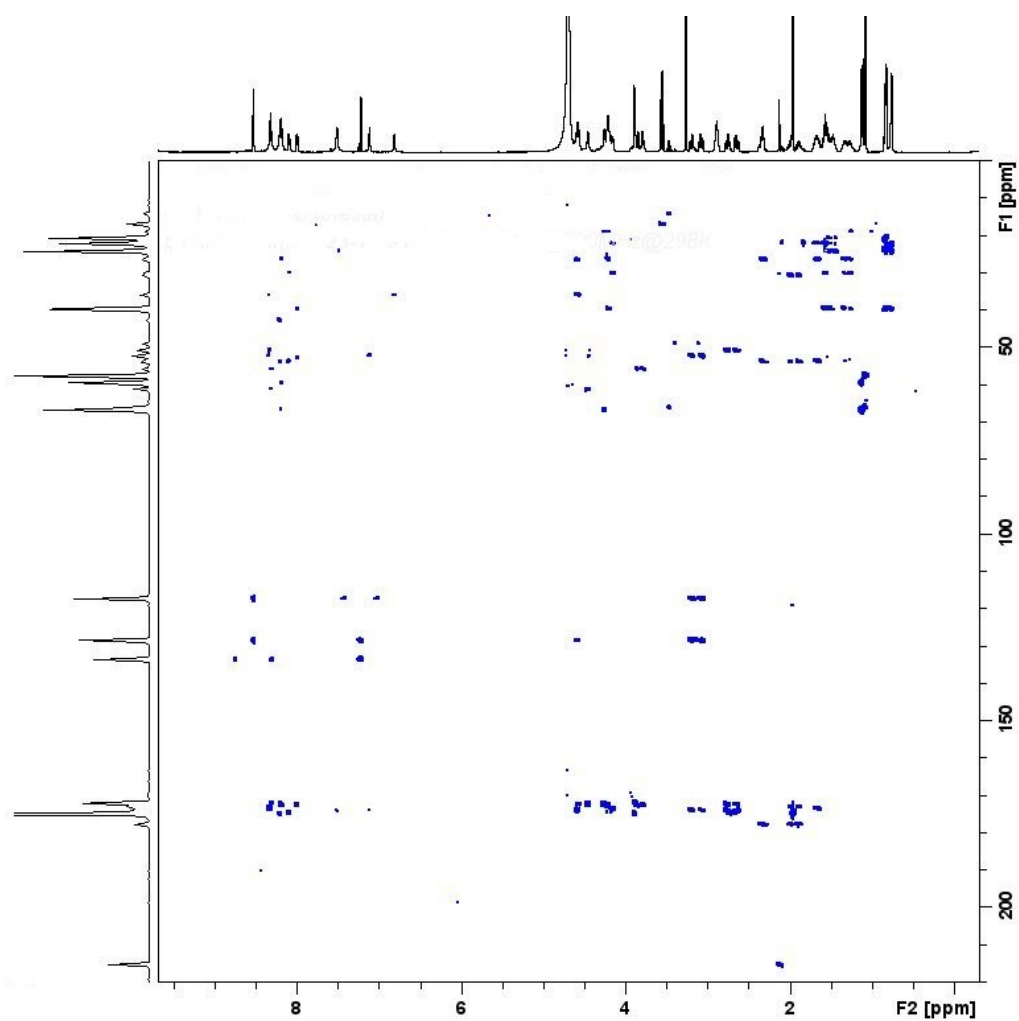

**Figure S5.**  $^1\text{H}$   $^{13}\text{C}$  HBMN NMR spectrum of the peptide Ac-GSTENLKH-NH<sub>2</sub> (C=2 mM and T=298K)

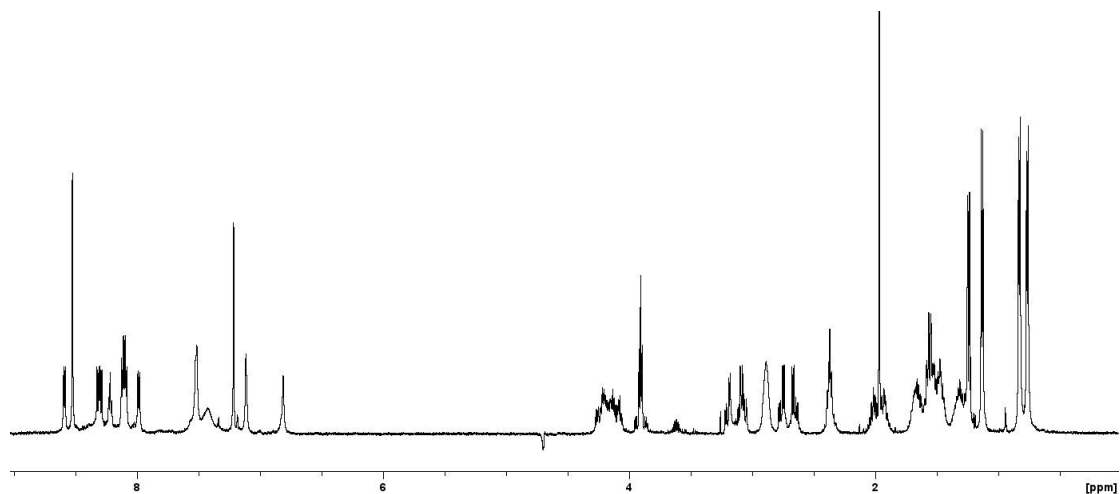

**Figure S6.** 1D  $^1\text{H}$  NMR spectrum of the peptide Ac-GS(P)TENLKH-NH<sub>2</sub> (C=2 mM and T=298K)

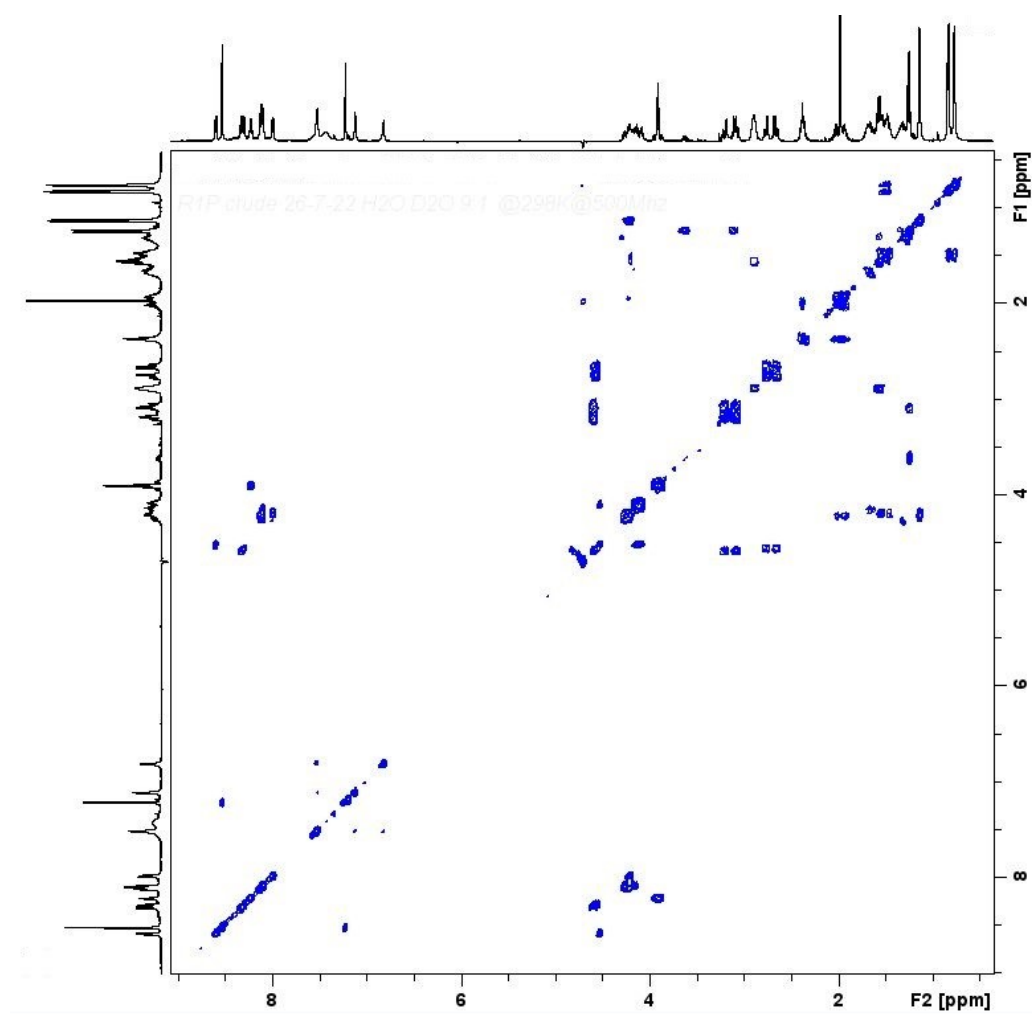

**Figure S7.**  $^1\text{H}$   $^1\text{H}$  COSY NMR spectrum of the peptide Ac-GS(P)TENLKH-NH<sub>2</sub> (C=2 mM and T=298K)

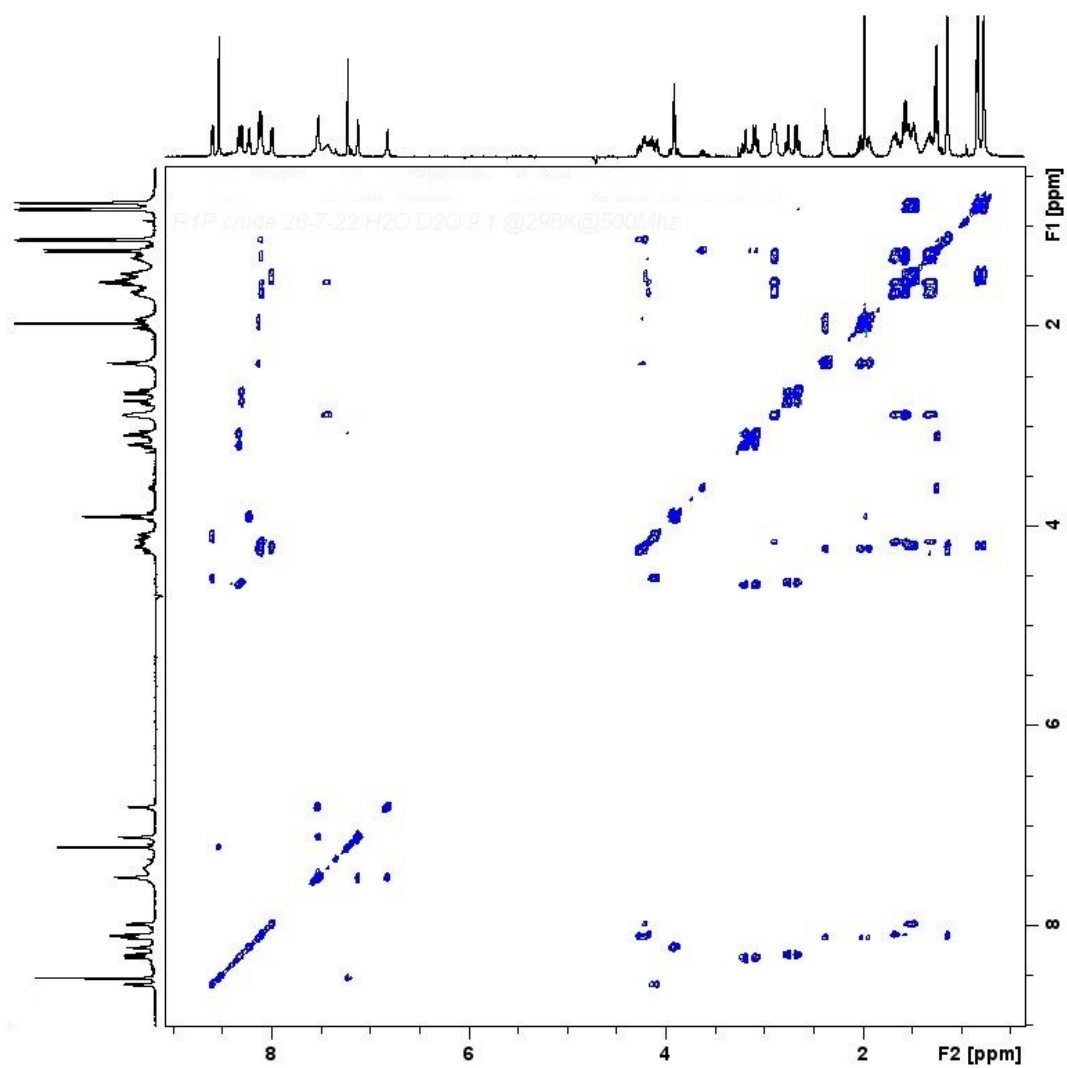

**Figure S8.**  $^1\text{H}$   $^1\text{H}$  TOCSY NMR spectrum of the peptide Ac-GS(P)TENLKH-NH<sub>2</sub> (C=2 mM and T=298K)

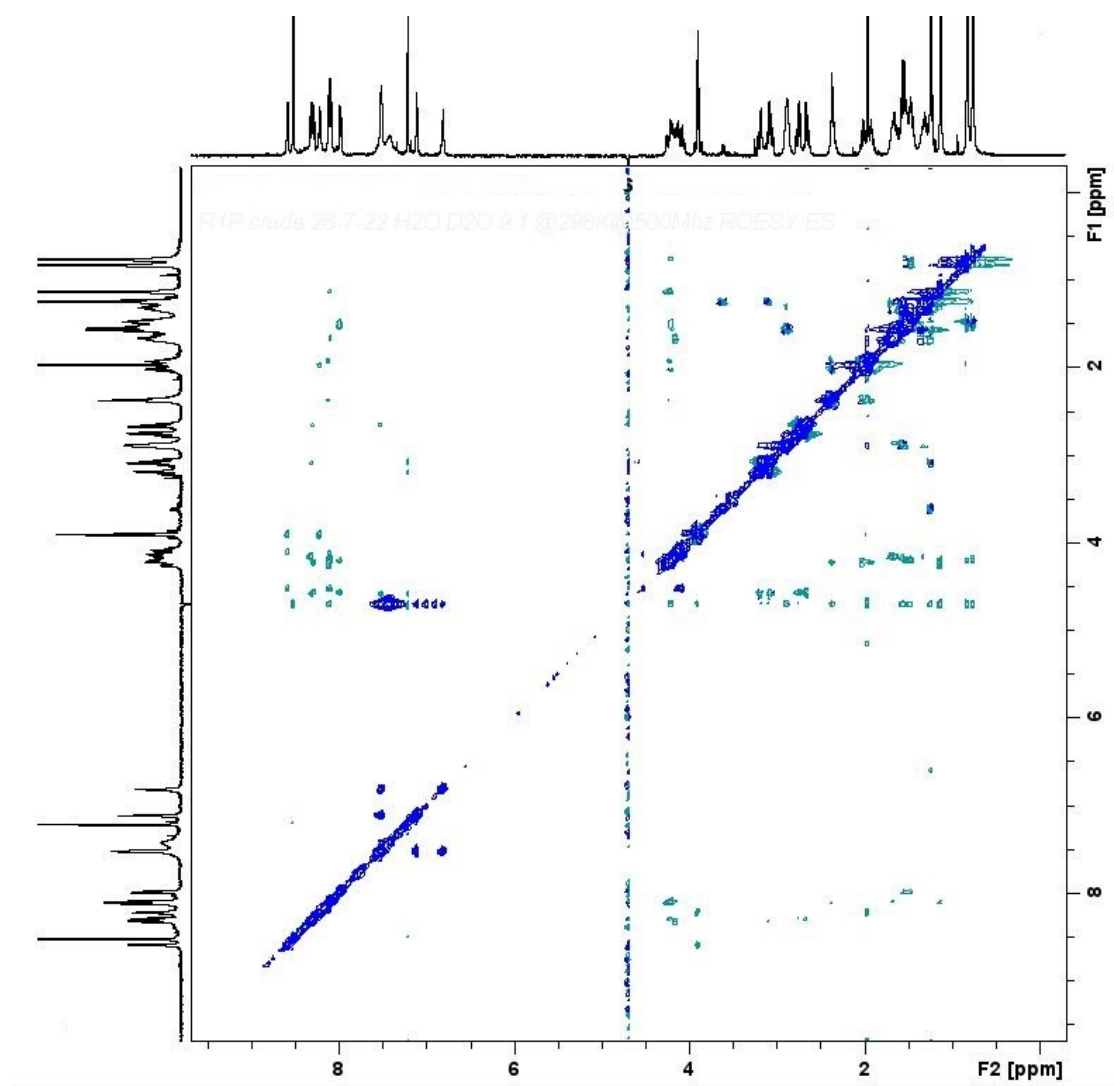

**Figure S9.**  $^1\text{H}$   $^1\text{H}$  ROESY NMR spectrum of the peptide Ac-GS(P)TENLKH-NH<sub>2</sub> (C=2 mM and T=298K)

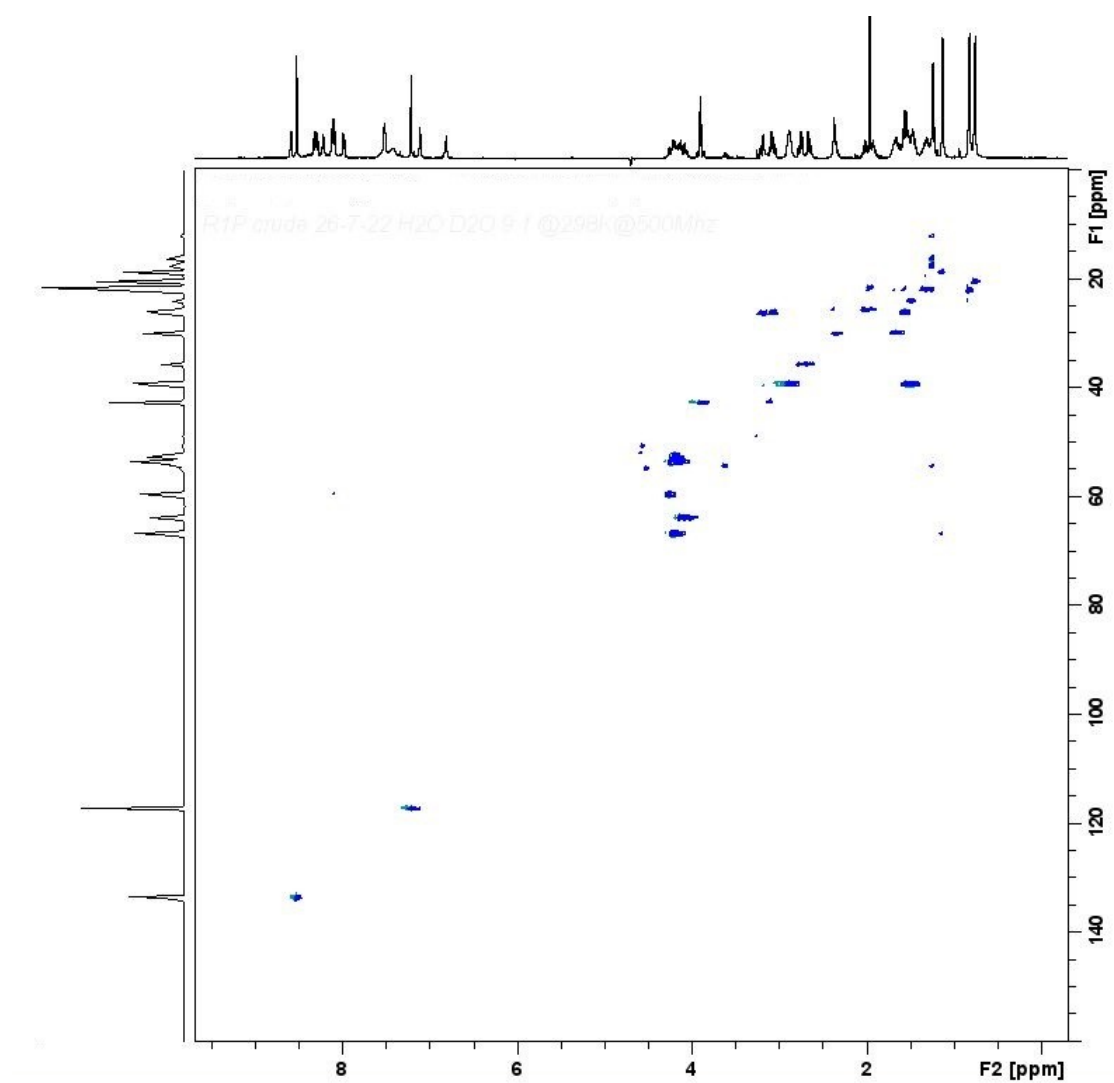

**Figure S10.**  $^1\text{H}$   $^{13}\text{C}$  HSQC NMR spectrum of the peptide Ac-GS(P)TENLKH-NH<sub>2</sub> (C=2 mM and T=298K)

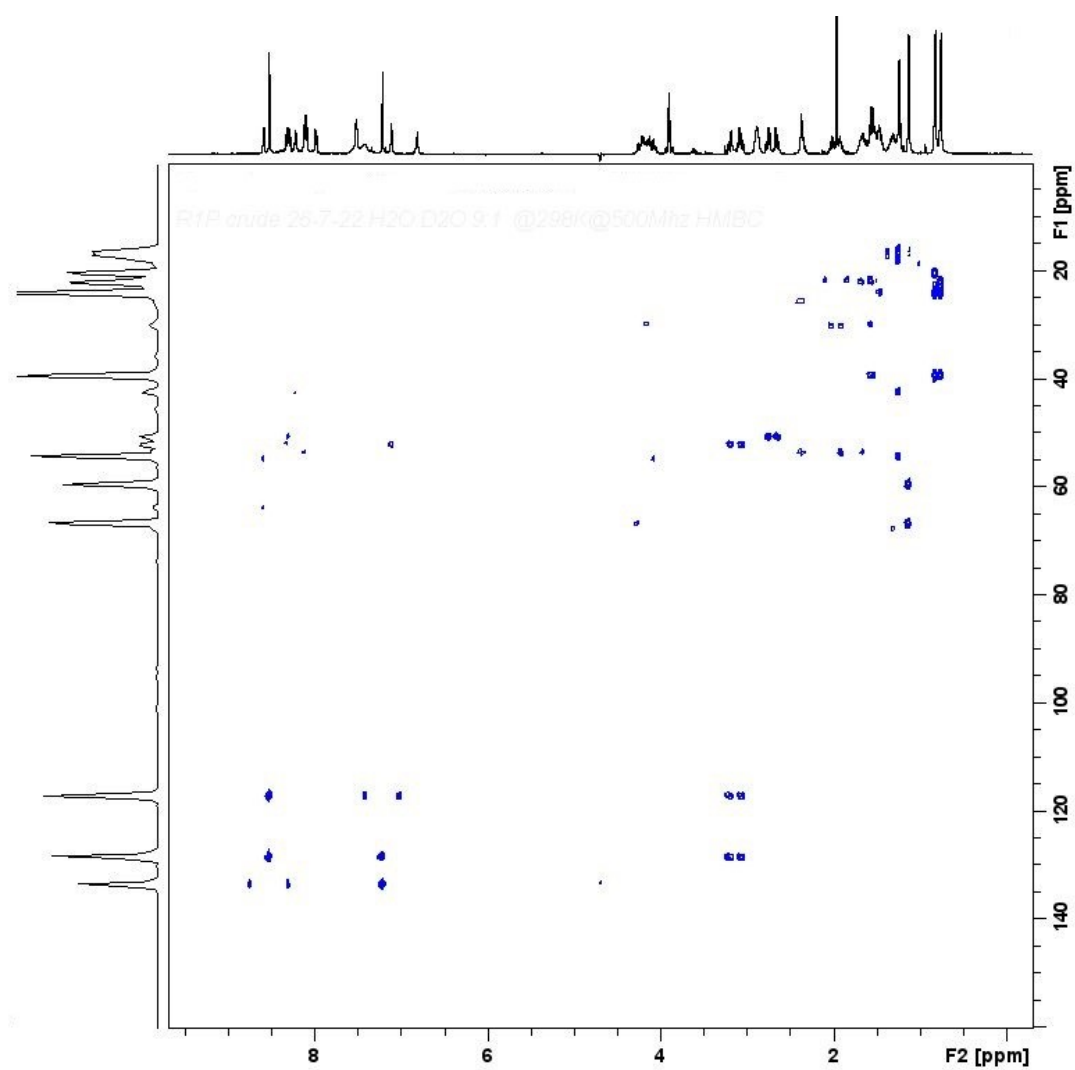

**Fig S11.**  $^1\text{H}$   $^{13}\text{C}$  HMBC NMR spectrum of the Ac-GS(P)TENLKH-NH<sub>2</sub> peptide (2 mM and T=298K)

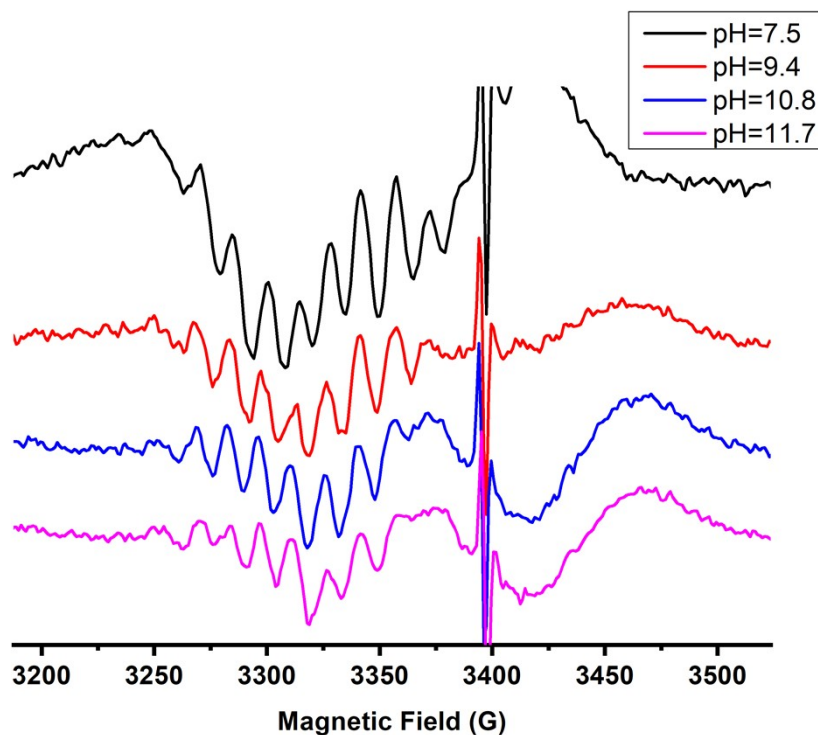

**Fig S12** The second derivative of the perpendicular region of EPR spectra for the system Cu(II): R1P recorded at the indicated pH values

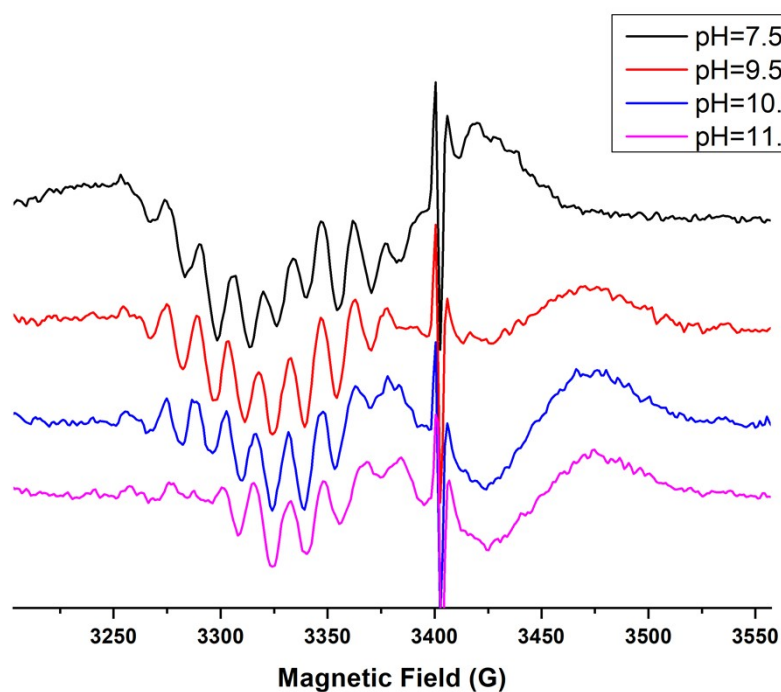

**Fig S13** The second derivative of the perpendicular region of EPR spectra for the system Cu(II): R1 recorded at the indicated pH values

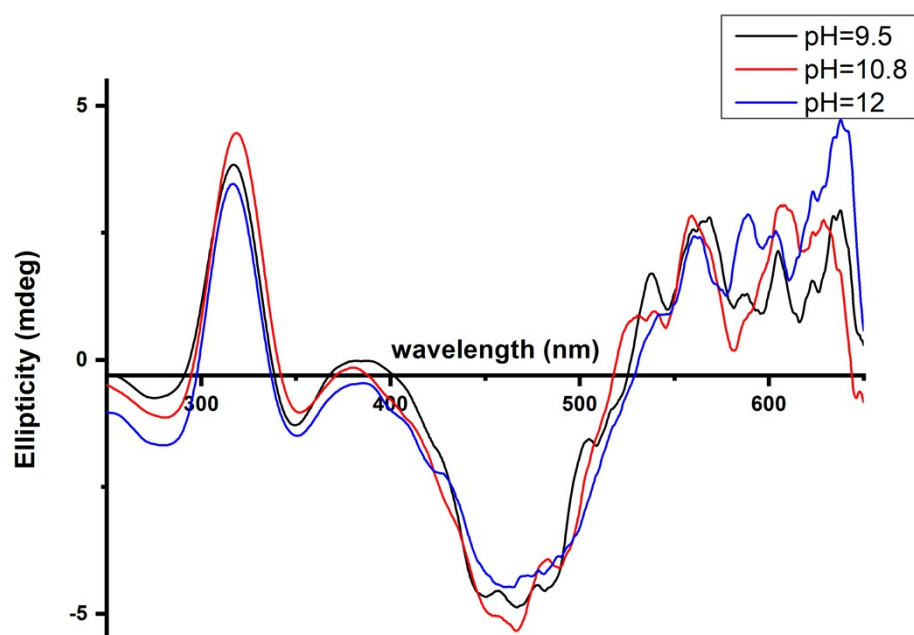

**Fig S14** Circular dichroism spectra of solutions of Cu(II) and R1 (Cu(II):R1 1:1.2)), recorded at the indicated pH values.
